# Supplementary material for: Physical function‐derived cut‐points for the diagnosis of sarcopenia and dynapenia from the Canadian longitudinal study on aging
Source: PubMed Central journal article supplement — J Cachexia Sarcopenia Muscle. 2019 Jul 15;10(5):985–99. doi: 10.1002/jcsm.12462 (PMC6818452; doi:10.1002/jcsm.12462), 2019-07-15
Supplement: JCSM-10-985-s001.pdf [file JCSM-10-985-s001.pdf]

**Supplementary Table 1.** Agreement of low handgrip strength cut-points with impaired physical performance

|                               | <b>Men</b> | <b>Women</b> |
|-------------------------------|------------|--------------|
| Positive percent agreement, % | 16.5       | 16.1         |
| Negative percent agreement, % | 95.8       | 96.1         |
| Kappa                         | 0.164      | 0.161        |

**Supplementary Table 2.** Agreement of low lean mass cut-points with low handgrip strength

|                               | <b>Men</b> | <b>Women</b> |
|-------------------------------|------------|--------------|
| Positive percent agreement, % | 38.1       | 40.3         |
| Negative percent agreement, % | 83.1       | 78.5         |
| Kappa                         | 0.212      | 0.142        |

**Supplementary Table 3.** Agreement of the CLSA with the FNIH criteria for sarcopenia (low lean mass)

|                               | <b>Men</b> | <b>Women</b> |
|-------------------------------|------------|--------------|
| Positive percent agreement, % | 33.8       | 20.3         |
| Negative percent agreement, % | 79.7       | 86.9         |
| Cohen's kappa                 | 0.088      | 0.055        |

**Supplementary Table 4.** Agreement of the CLSA with the FNIH criteria for sarcopenia

|                               | <b>Men</b> | <b>Women</b> |
|-------------------------------|------------|--------------|
| Positive percent agreement, % | 49.2       | 26.9         |
| Negative percent agreement, % | 92.3       | 94.8         |
| Cohen's kappa                 | 0.120      | 0.078        |

**Supplementary Figure 1.** Flow of participants in the CLSA cohort

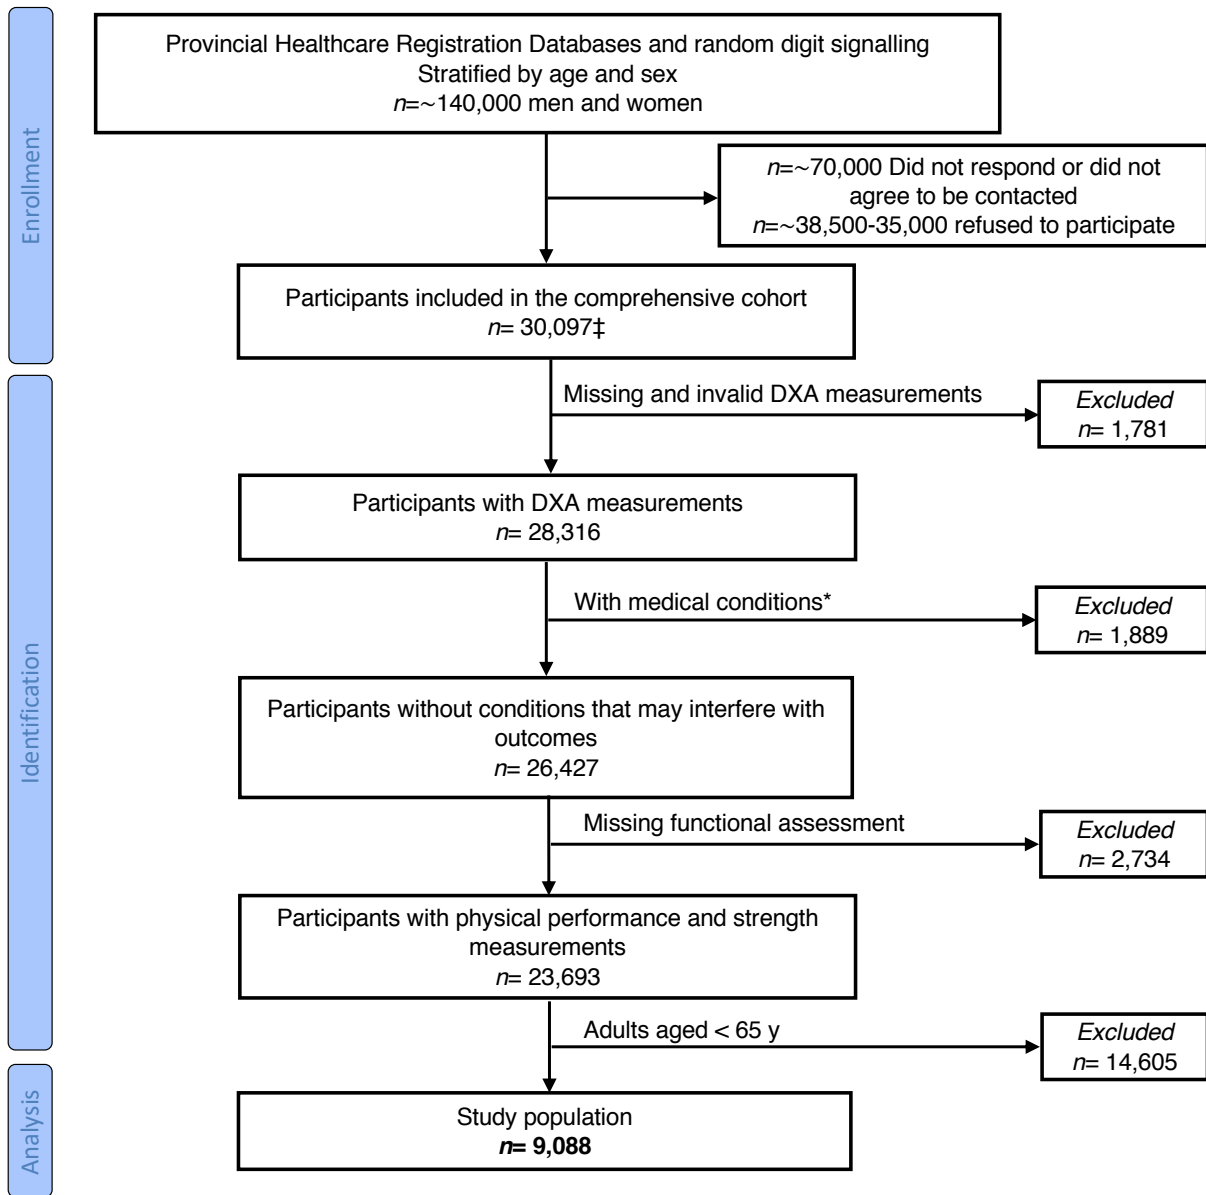

‡ Exclusion criteria are described by Raina et al. [20]. \*Medical conditions that may have interfered with any of the measured outcomes including multiple sclerosis, Alzheimer’s disease, effects from stroke or transient ischemic attack (TIA), Parkinson’s disease, surgery within last 3 months, polio, unstable heart condition within last 3 months, pulmonary embolism within last 6 weeks, chemotherapy within last 4 weeks.

**Supplementary Figure 2** Prevalence rates of impaired physical performance, low strength and low lean mass

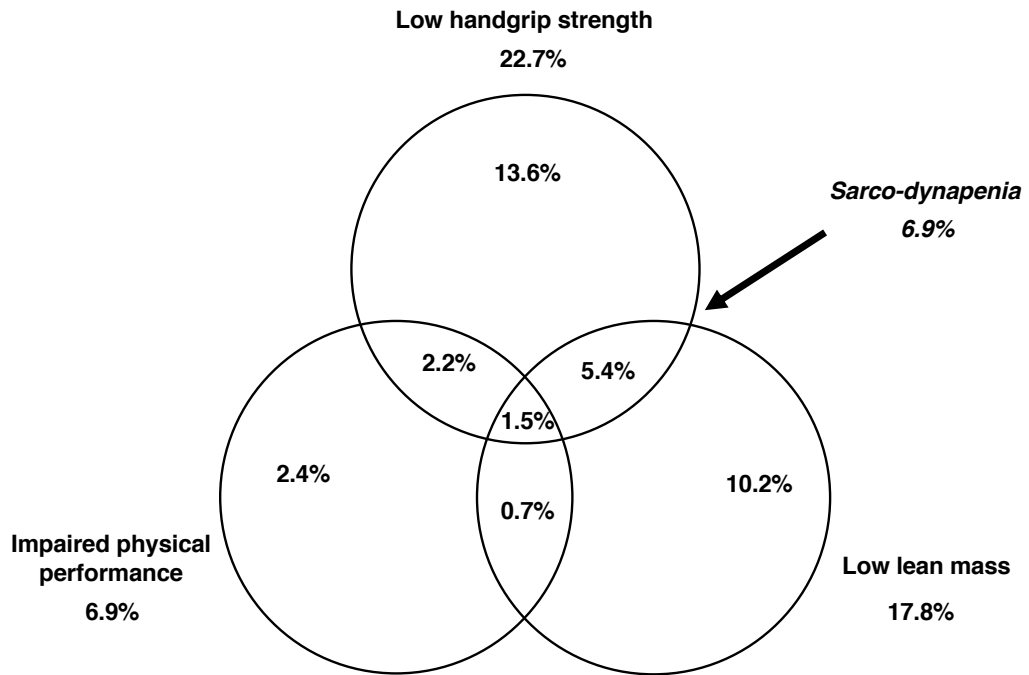

**Supplementary Figure 3** Prevalence rates of low gait speed, strength and lean mass reported by the FNIH Sarcopenia Project and applying the FNIH criteria to the CLSA

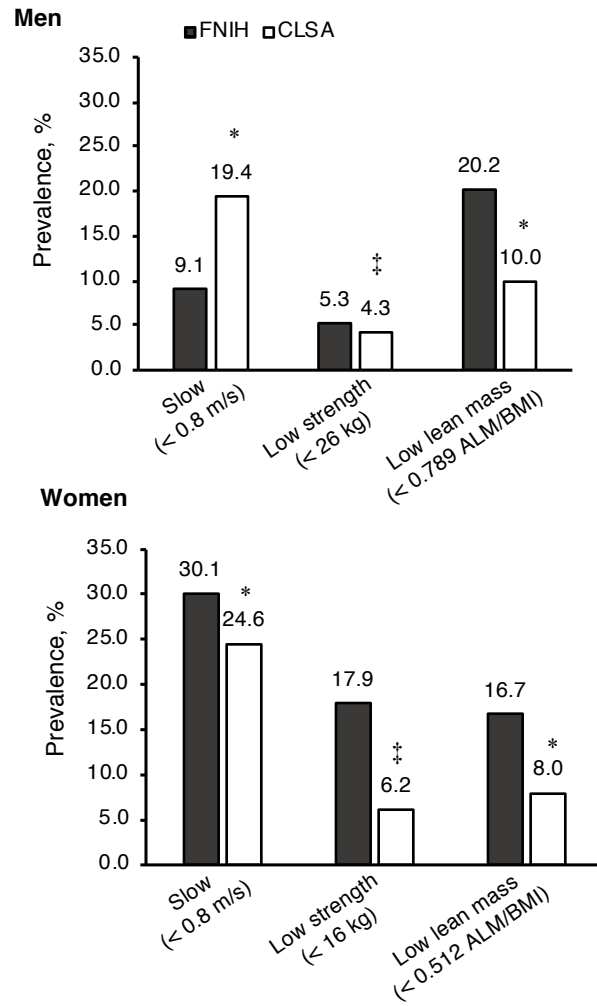

Chi-square test, \*p-value < 0.001, ‡ p-value < 0.01 vs. the FNIH prevalence.
